# Supplementary material
Source: Springer Nature journal article supplement (https://www.springermedizin.de/resource/supplementary/13054_2012_606_MOESM2_ESM.pdf/9708834)

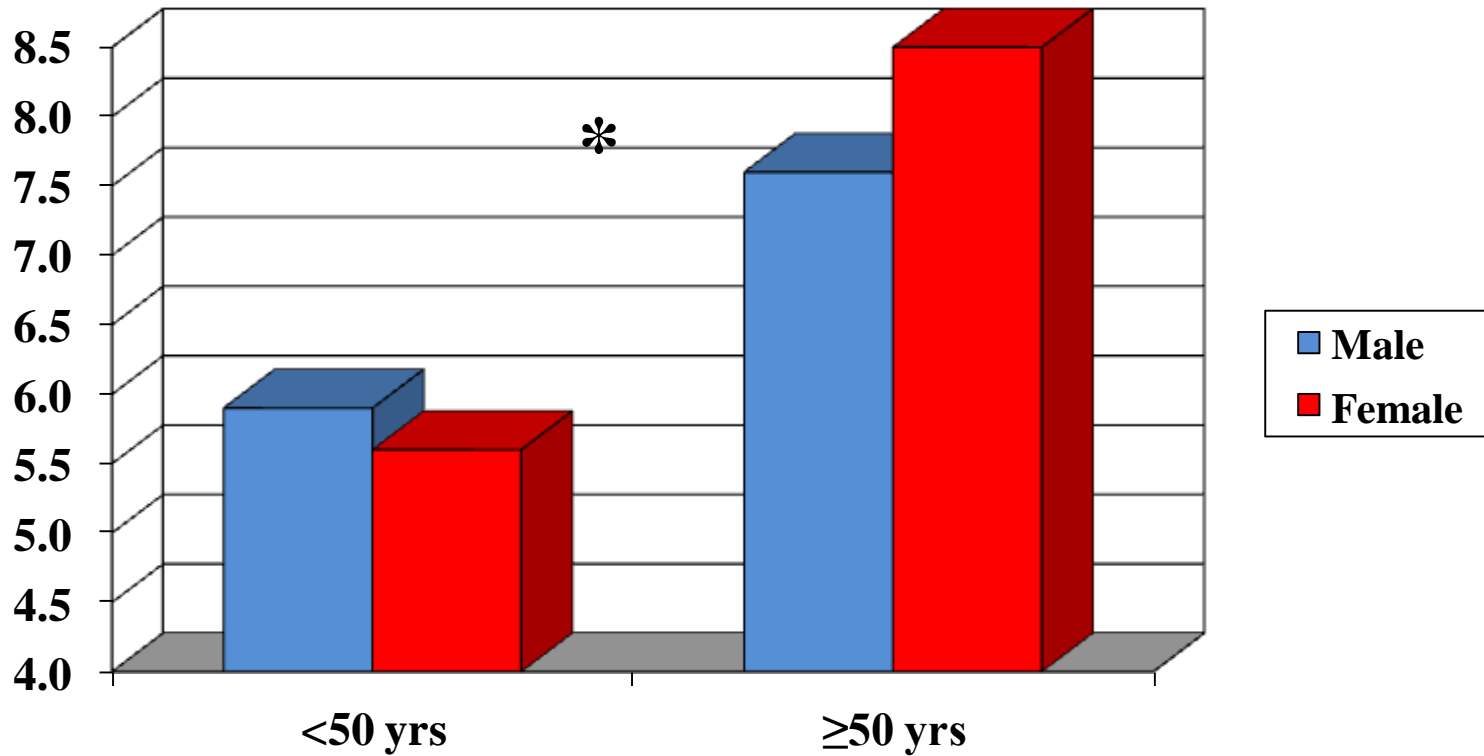

\* p-value for interaction is <math><0.0001</math>

Supplement: MOESM2 [file 9708834]
